# Supplementary material for: BEST: a web server for brain expression Spatio-temporal pattern analysis
Source: BMC Bioinformatics. 2019 Dec 5;20:632. doi: 10.1186/s12859-019-3222-6 (PMC6896511; doi:10.1186/s12859-019-3222-6)
Supplement: Supplementary file 2 — Additional file 2: Table S3. The Summary of Spatio-Temporal categories in reference datasets. [file 12859_2019_3222_MOESM2_ESM.xlsx]

## Sheet: Sheet1
Table S3. The Summary of Spatio-Temporal categories in reference datasets.
Dataset1
	Early fetal	Mid-fetal	Late fetal	Neonatal and infancy	Early childhood	Middle and late childhood	Adolescence	Young adulthood	Middle adulthood	Late adulthood
Frontal cortex	1	2	3	4	5	6	7	8	9	10
Parietal cortex	11	12	13	14	15	16	17	18	19	20
Temporal Cortex	21	22	23	24	25	26	27	28	29	30
Occipital Cortex	31	32	33	34	35	36	37	38	39	40
Hippocampus	41	42	43	44	45	46	47	48	49	50
Amygdala	51	52	53	54	55	56	57	58	59	60
Striatum	61	62	63	64	65	66	67	68	69	70
Insula	71	72	73	74	75	76	77	78	79	80
Parahippocampal gyrus	81	82	83	84	85	86	87	88	89	90
Cingulate cortex	91	92	93	94	95	96	97	98	99	100
Substantia nigra	101	102	103	104	105	106	107	108	109	110
Nucleus accumbens	111	112	113	114	115	116	117	118	119	120
Thalamus	121	122	123	124	125	126	127	128	129	130
Olfactory bulb	131	132	133	134	135	136	137	138	139	140
Hypothalamus	141	142	143	144	145	146	147	148	149	150
Cerebellum	151	152	153	154	155	156	157	158	159	160
Dataset2
	Early fetal	Mid-fetal	Late fetal	Neonatal and infancy	Early childhood	Middle and late childhood	Adolescence	Young adulthood	Middle adulthood	Late adulthood
Frontal cortex	1	2	3	4	5	6	7	8	9	10
Parietal cortex	11	12	13	14	15	16	17	18	19	20
Temporal Cortex	21	22	23	24	25	26	27	28	29	30
Occipital Cortex	31	32	33	34	35	36	37	38	39	40
Hippocampus	41	42	43	44	45	46	47	48	49	50
Amygdala	51	52	53	54	55	56	57	58	59	60
Striatum	61	62	63	64	65	66	67	68	69	70
Insula	71	72	73	74	75	76	77	78	79	80
Parahippocampal gyrus	81	82	83	84	85	86	87	88	89	90
Cingulate cortex	91	92	93	94	95	96	97	98	99	100
Substantia nigra	101	102	103	104	105	106	107	108	109	110
Nucleus accumbens	111	112	113	114	115	116	117	118	119	120
Thalamus	121	122	123	124	125	126	127	128	129	130
Olfactory bulb	131	132	133	134	135	136	137	138	139	140
Hypothalamus	141	142	143	144	145	146	147	148	149	150
Cerebellum	151	152	153	154	155	156	157	158	159	160
Dataset3
	Early fetal	Mid-fetal	Late fetal	Neonatal and infancy	Early childhood	Middle and late childhood	Adolescence	Young adulthood	Middle adulthood	Late adulthood
Frontal cortex	1	2	3	4	5	6	7	8	9	10
Parietal cortex	11	12	13	14	15	16	17	18	19	20
Temporal Cortex	21	22	23	24	25	26	27	28	29	30
Occipital Cortex	31	32	33	34	35	36	37	38	39	40
Hippocampus	41	42	43	44	45	46	47	48	49	50
Amygdala	51	52	53	54	55	56	57	58	59	60
Striatum	61	62	63	64	65	66	67	68	69	70
Insula	71	72	73	74	75	76	77	78	79	80
Parahippocampal gyrus	81	82	83	84	85	86	87	88	89	90
Cingulate cortex	91	92	93	94	95	96	97	98	99	100
Substantia nigra	101	102	103	104	105	106	107	108	109	110
Nucleus accumbens	111	112	113	114	115	116	117	118	119	120
Thalamus	121	122	123	124	125	126	127	128	129	130
Olfactory bulb	131	132	133	134	135	136	137	138	139	140
Hypothalamus	141	142	143	144	145	146	147	148	149	150
Cerebellum	151	152	153	154	155	156	157	158	159	160
Dataset4
	Early fetal	Mid-fetal	Late fetal	Neonatal and infancy	Early childhood	Middle and late childhood	Adolescence	Young adulthood	Middle adulthood	Late adulthood
Frontal cortex	1	2	3	4	5	6	7	8	9	10
Parietal cortex	11	12	13	14	15	16	17	18	19	20
Temporal Cortex	21	22	23	24	25	26	27	28	29	30
Occipital Cortex	31	32	33	34	35	36	37	38	39	40
Hippocampus	41	42	43	44	45	46	47	48	49	50
Amygdala	51	52	53	54	55	56	57	58	59	60
Striatum	61	62	63	64	65	66	67	68	69	70
Insula	71	72	73	74	75	76	77	78	79	80
Parahippocampal gyrus	81	82	83	84	85	86	87	88	89	90
Cingulate cortex	91	92	93	94	95	96	97	98	99	100
Substantia nigra	101	102	103	104	105	106	107	108	109	110
Nucleus accumbens	111	112	113	114	115	116	117	118	119	120
Thalamus	121	122	123	124	125	126	127	128	129	130
Olfactory bulb	131	132	133	134	135	136	137	138	139	140
Hypothalamus	141	142	143	144	145	146	147	148	149	150
Cerebellum	151	152	153	154	155	156	157	158	159	160
Dataset5
	Early fetal	Mid-fetal	Late fetal	Neonatal and infancy	Early childhood	Middle and late childhood	Adolescence	Young adulthood	Middle adulthood	Late adulthood
Frontal cortex	1	2	3	4	5	6	7	8	9	10
Parietal cortex	11	12	13	14	15	16	17	18	19	20
Temporal Cortex	21	22	23	24	25	26	27	28	29	30
Occipital Cortex	31	32	33	34	35	36	37	38	39	40
Hippocampus	41	42	43	44	45	46	47	48	49	50
Amygdala	51	52	53	54	55	56	57	58	59	60
Striatum	61	62	63	64	65	66	67	68	69	70
Insula	71	72	73	74	75	76	77	78	79	80
Parahippocampal gyrus	81	82	83	84	85	86	87	88	89	90
Cingulate cortex	91	92	93	94	95	96	97	98	99	100
Substantia nigra	101	102	103	104	105	106	107	108	109	110
Nucleus accumbens	111	112	113	114	115	116	117	118	119	120
Thalamus	121	122	123	124	125	126	127	128	129	130
Olfactory bulb	131	132	133	134	135	136	137	138	139	140
Hypothalamus	141	142	143	144	145	146	147	148	149	150
Cerebellum	151	152	153	154	155	156	157	158	159	160
Dataset6
	Early fetal	Mid-fetal	Late fetal	Neonatal and infancy	Early childhood	Middle and late childhood	Adolescence	Young adulthood	Middle adulthood	Late adulthood
Frontal cortex	1	2	3	4	5	6	7	8	9	10
Parietal cortex	11	12	13	14	15	16	17	18	19	20
Temporal Cortex	21	22	23	24	25	26	27	28	29	30
Occipital Cortex	31	32	33	34	35	36	37	38	39	40
Hippocampus	41	42	43	44	45	46	47	48	49	50
Amygdala	51	52	53	54	55	56	57	58	59	60
Striatum	61	62	63	64	65	66	67	68	69	70
Insula	71	72	73	74	75	76	77	78	79	80
Parahippocampal gyrus	81	82	83	84	85	86	87	88	89	90
Cingulate cortex	91	92	93	94	95	96	97	98	99	100
Substantia nigra	101	102	103	104	105	106	107	108	109	110
Nucleus accumbens	111	112	113	114	115	116	117	118	119	120
Thalamus	121	122	123	124	125	126	127	128	129	130
Olfactory bulb	131	132	133	134	135	136	137	138	139	140
Hypothalamus	141	142	143	144	145	146	147	148	149	150
Cerebellum	151	152	153	154	155	156	157	158	159	160
Dataset7
	Early fetal	Mid-fetal	Late fetal	Neonatal and infancy	Early childhood	Middle and late childhood	Adolescence	Young adulthood	Middle adulthood	Late adulthood
Frontal cortex	1	2	3	4	5	6	7	8	9	10
Parietal cortex	11	12	13	14	15	16	17	18	19	20
Temporal Cortex	21	22	23	24	25	26	27	28	29	30
Occipital Cortex	31	32	33	34	35	36	37	38	39	40
Hippocampus	41	42	43	44	45	46	47	48	49	50
Amygdala	51	52	53	54	55	56	57	58	59	60
Striatum	61	62	63	64	65	66	67	68	69	70
Insula	71	72	73	74	75	76	77	78	79	80
Parahippocampal gyrus	81	82	83	84	85	86	87	88	89	90
Cingulate cortex	91	92	93	94	95	96	97	98	99	100
Substantia nigra	101	102	103	104	105	106	107	108	109	110
Nucleus accumbens	111	112	113	114	115	116	117	118	119	120
Thalamus	121	122	123	124	125	126	127	128	129	130
Olfactory bulb	131	132	133	134	135	136	137	138	139	140
Hypothalamus	141	142	143	144	145	146	147	148	149	150
Cerebellum	151	152	153	154	155	156	157	158	159	160
Dataset8
	Early fetal	Mid-fetal	Late fetal	Neonatal and infancy	Early childhood	Middle and late childhood	Adolescence	Young adulthood	Middle adulthood	Late adulthood
Frontal cortex	1	2	3	4	5	6	7	8	9	10
Parietal cortex	11	12	13	14	15	16	17	18	19	20
Temporal Cortex	21	22	23	24	25	26	27	28	29	30
Occipital Cortex	31	32	33	34	35	36	37	38	39	40
Hippocampus	41	42	43	44	45	46	47	48	49	50
Amygdala	51	52	53	54	55	56	57	58	59	60
Striatum	61	62	63	64	65	66	67	68	69	70
Insula	71	72	73	74	75	76	77	78	79	80
Parahippocampal gyrus	81	82	83	84	85	86	87	88	89	90
Cingulate cortex	91	92	93	94	95	96	97	98	99	100
Substantia nigra	101	102	103	104	105	106	107	108	109	110
Nucleus accumbens	111	112	113	114	115	116	117	118	119	120
Thalamus	121	122	123	124	125	126	127	128	129	130
Olfactory bulb	131	132	133	134	135	136	137	138	139	140
Hypothalamus	141	142	143	144	145	146	147	148	149	150
Cerebellum	151	152	153	154	155	156	157	158	159	160
