# Supplementary material for: BEST: a web server for brain expression Spatio-temporal pattern analysis
Source: BMC Bioinformatics. 2019 Dec 5;20:632. doi: 10.1186/s12859-019-3222-6 (PMC6896511; doi:10.1186/s12859-019-3222-6)
Supplement: Supplementary file 3 — Additional file 3: Table S4. The addational Spatio-Temporal categories in reference dataset 1. [file 12859_2019_3222_MOESM3_ESM.xlsx]

## Sheet: Sheet1
Table S4. The addational Spatio-Temporal categories in reference dataset1.
	Early fetal	Mid-fetal	Late fetal	Neonatal and infancy	Early childhood	Middle and late childhood	Adolescence	Young adulthood	Middle adulthood
dorsolateral prefrontal cortex	1-1	2-1	3-1	4-1	5-1	6-1	7-1	8-1	9-1
orbital frontal cortex	1-2	2-2	3-2	4-2	5-2	6-2	7-2	8-2	9-2
ventrolateral prefrontal cortex	1-3	2-3	3-3	4-3	5-3	6-3	7-3	8-3	9-3
primary motor cortex	1-4	2-4	3-4	4-4	5-4	6-4	7-4	8-4	/
primary somatosensory cortex (area S1, areas 3,1,2)	11-1	12-1	13-1	/	15-1	/	/	18-1	19-1
posteroventral (inferior) parietal cortex	11-2	12-2	13-2	14-2	15-2	16-2	17-2	18-2	/
parietal neocortex	/	/	/	14-3	/	/	/	18-3	/
primary auditory cortex (core)	21-1	22-1	23-1	24-1	25-1	26-1	27-1	28-1	29-1
posterior (caudal) superior temporal cortex (area 22c)	21-2	22-2	23-2	24-2	25-2	26-2	27-2	28-2	/
inferolateral temporal cortex (area TEv, area 20)	21-3	22-3	23-3	24-3	25-3	26-3	27-3	28-3	29-3
temporal neocortex	/	/	/	/	/	/	27-4	/	/
primary visual cortex (striate cortex, area V1/17)	31-1	32-1	33-1	34-1	35-1	36-1	37-1	38-1	39-1
occipital neocortex	31-2	/	/	/	/	/	/	38-2	/
hippocampus (hippocampal formation)	41	42	43	/	45	46	/	48	49
amygdaloid complex	51	52	53	54	55	56	57	58	/
striatum	61-1	62-1	63-1	64-1	65-1	66-1	67-1	68-1	/
medial ganglionic eminence	/	62-2	/	/	/	/	67-2	/	/
caudal ganglionic eminence	/	62-3	/	/	/	/	/	68-3	/
lateral ganglionic eminence	/	62-4	/	/	/	66-4	/	/	/
anterior (rostral) cingulate (medial prefrontal) cortex	91	92	/	94	95	96	97	98	/
dorsal thalamus	121-1	122-1	/	/	/	126-1	/	/	/
mediodorsal nucleus of thalamus	121-2	122-2	123-2	124-2	/	126-2	127-2	128-2	/
cerebellum	/	152-1	/	/	155-1	/	/	158-1	/
cerebellar cortex	151-2	152-2	153-2	154-2	155-2	156-2	157-2	158-2	159-2
upper (rostral) rhombic lip	/	152-3	/	/	/	156-3	/	/	/
