# Supplementary material for: BEST: a web server for brain expression Spatio-temporal pattern analysis
Source: BMC Bioinformatics. 2019 Dec 5;20:632. doi: 10.1186/s12859-019-3222-6 (PMC6896511; doi:10.1186/s12859-019-3222-6)
Supplement: Supplementary file 4 — Additional file 4: Table S5. The addational Spatio-Temporal categories in reference dataset 2. [file 12859_2019_3222_MOESM4_ESM.xlsx]

## Sheet: Sheet1
Table S5. The addational Spatio-Temporal categories in reference dataset2.
	Young adulthood	Middle adulthood
superior frontal gyrus	8-1	9-1
inferior frontal gyrus	8-2	9-2
medial orbital gyrus	8-3	9-3
middle frontal gyrus	8-4	9-4
precentral gyrus	8-5	9-5
posterior orbital gyrus	8-6	9-6
lateral orbital gyrus	8-7	9-7
gyrus rectus	8-8	9-8
anterior orbital gyrus	8-9	9-9
frontal pole	8-10	/
superior parietal lobule	18-1	19-1
postcentral gyrus	18-2	19-2
precuneus	18-3	19-3
supramarginal gyrus	18-4	19-4
angular gyrus	18-5	19-5
middle temporal gyrus	28-1	29-1
inferior temporal gyrus	28-2	29-2
superior temporal gyrus	28-3	29-3
fusiform gyrus	28-4	29-4
temporal pole	28-5	29-5
cuneus	38-1	39-1
lingual gyrus	38-2	39-2
superior occipital gyrus	38-3	39-3
inferior occipital gyrus	38-4	39-4
occipital pole	/	39-5
dentate gyrus	48-1	49-1
CA1 pyramidal cell layers	48-2	49-2
CA2 pyramidal cell layers	48-3	49-3
CA3 pyramidal cell layers	48-4	49-4
CA4 pyramidal cell layers	48-5	49-5
subiculum	48-6	49-6
putamen	68-1	69-1
Globus Pallidus	68-2	69-2
body of the caudate nucleus	68-3	69-3
head of the caudate nucleus	68-4	69-4
tail of the caudate nucleus	68-5	/
long insular gyri	78-1	79-1
short insular gyri	78-2	79-2
parahippocampal gyrus	88	89
cingulate gyrus	98	99
Substantia nigra	108	109
Nucleus accumbens	118	119
reticular nucleus of thalamus	128	129
olfactory tubercle	138	139
anterior hypothalamic area	148-1	/
lateral hypothalamic area	148-2	149-2
paraventricular nucleus of the hypothalamus	148-3	149-3
posterior hypothalamic area	148-4	149-4
arcuate nucleus of the hypothalamus	148-5	149-5
dorsomedial hypothalamic nucleus	148-6	149-6
ventromedial hypothalamic nucleus	148-7	149-7
